# Supplementary material
Source: PubMed Central journal article supplement (PMC7451034)
Supplement: jmm-69-854-s001.pdf [file jmm-69-854-s001.pdf]

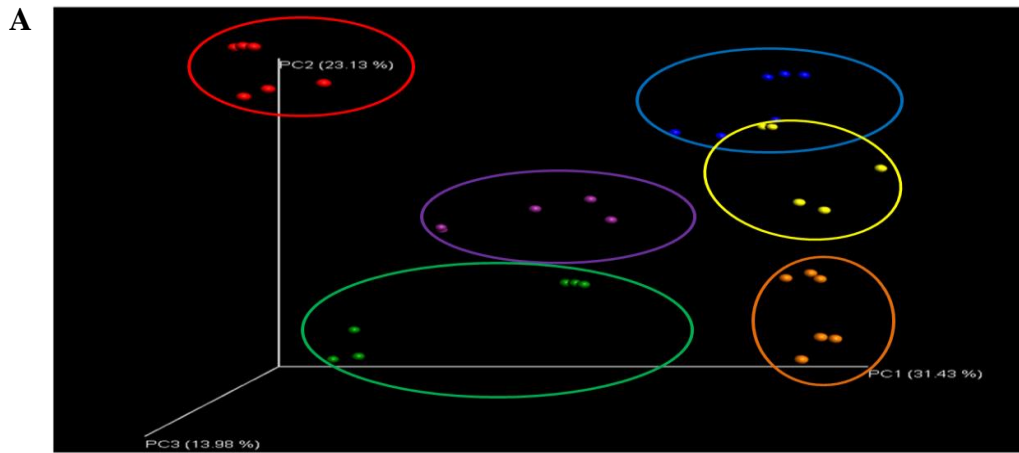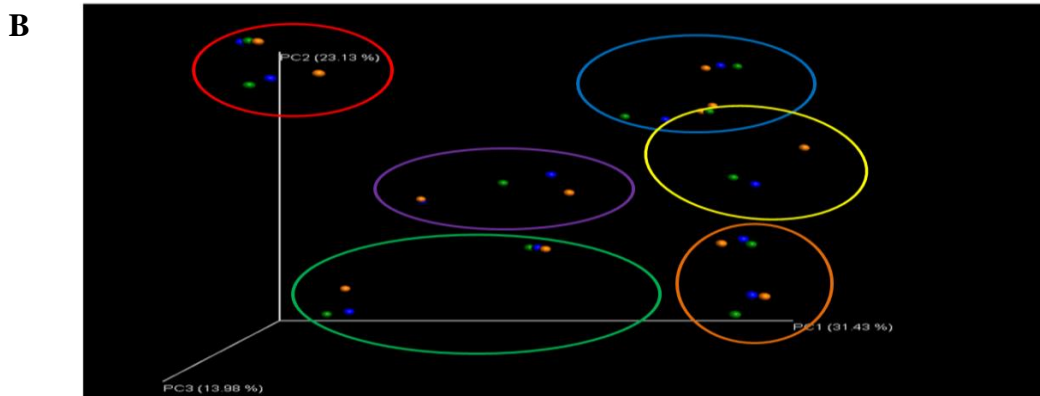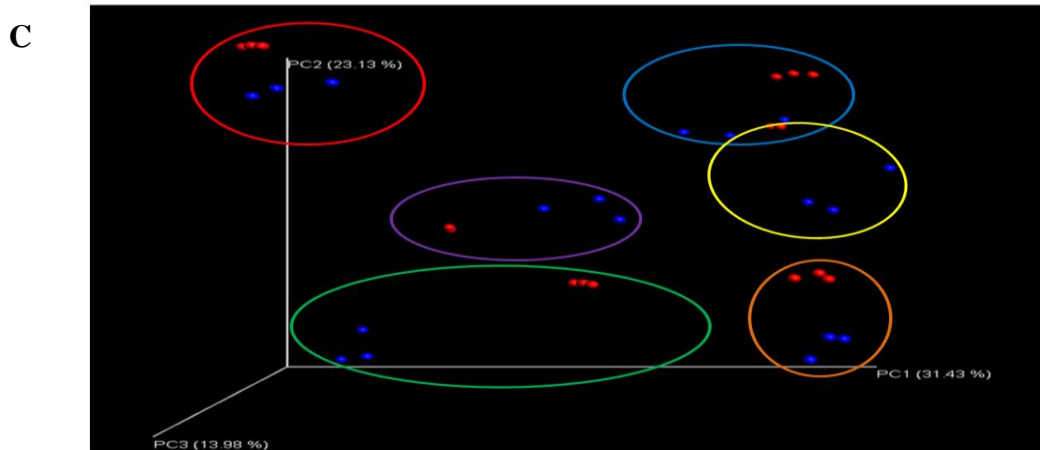

**Supplementary Figure S1.** PCoA plots based on unweighted UniFrac distance matrices. Each large circle represents an individual fecal donor. **(A)** samples presented by subject. Each sphere colour within the large circle represents an individual fecal donor sample at 0 and 24 h. **(B)** samples by treatment. Each large circle represents a subject and each sphere colour represents a treatment: orange: no treatment; blue: treated with minispheres with Cyclosporine A (CyA); green: treated with minispheres without CyA. **(C)** samples by time-point: red spheres, 0 hour; blue spheres, 24 hours.

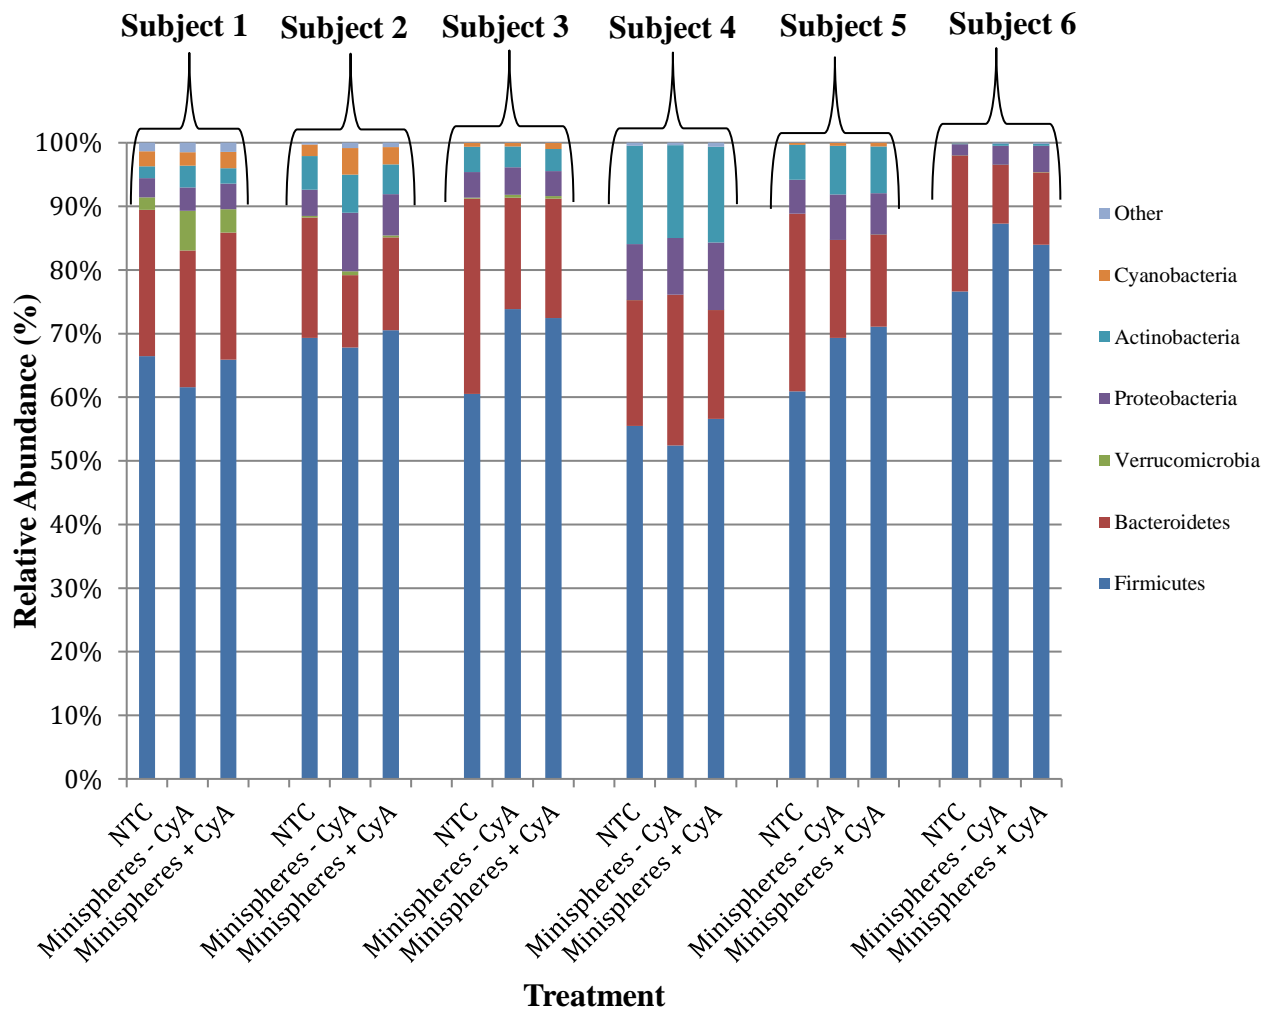

**Supplementary Figure S2.** Relative abundance (%) of the phyla across treatment groups in fecal samples from six subjects (1-6) following 24 hour fermentation in an *ex vivo* model. Groups: non-treatment control (NTC); Minispheres without (-) Cyclosporine A (CyA), Minispheres with (+) CyA.

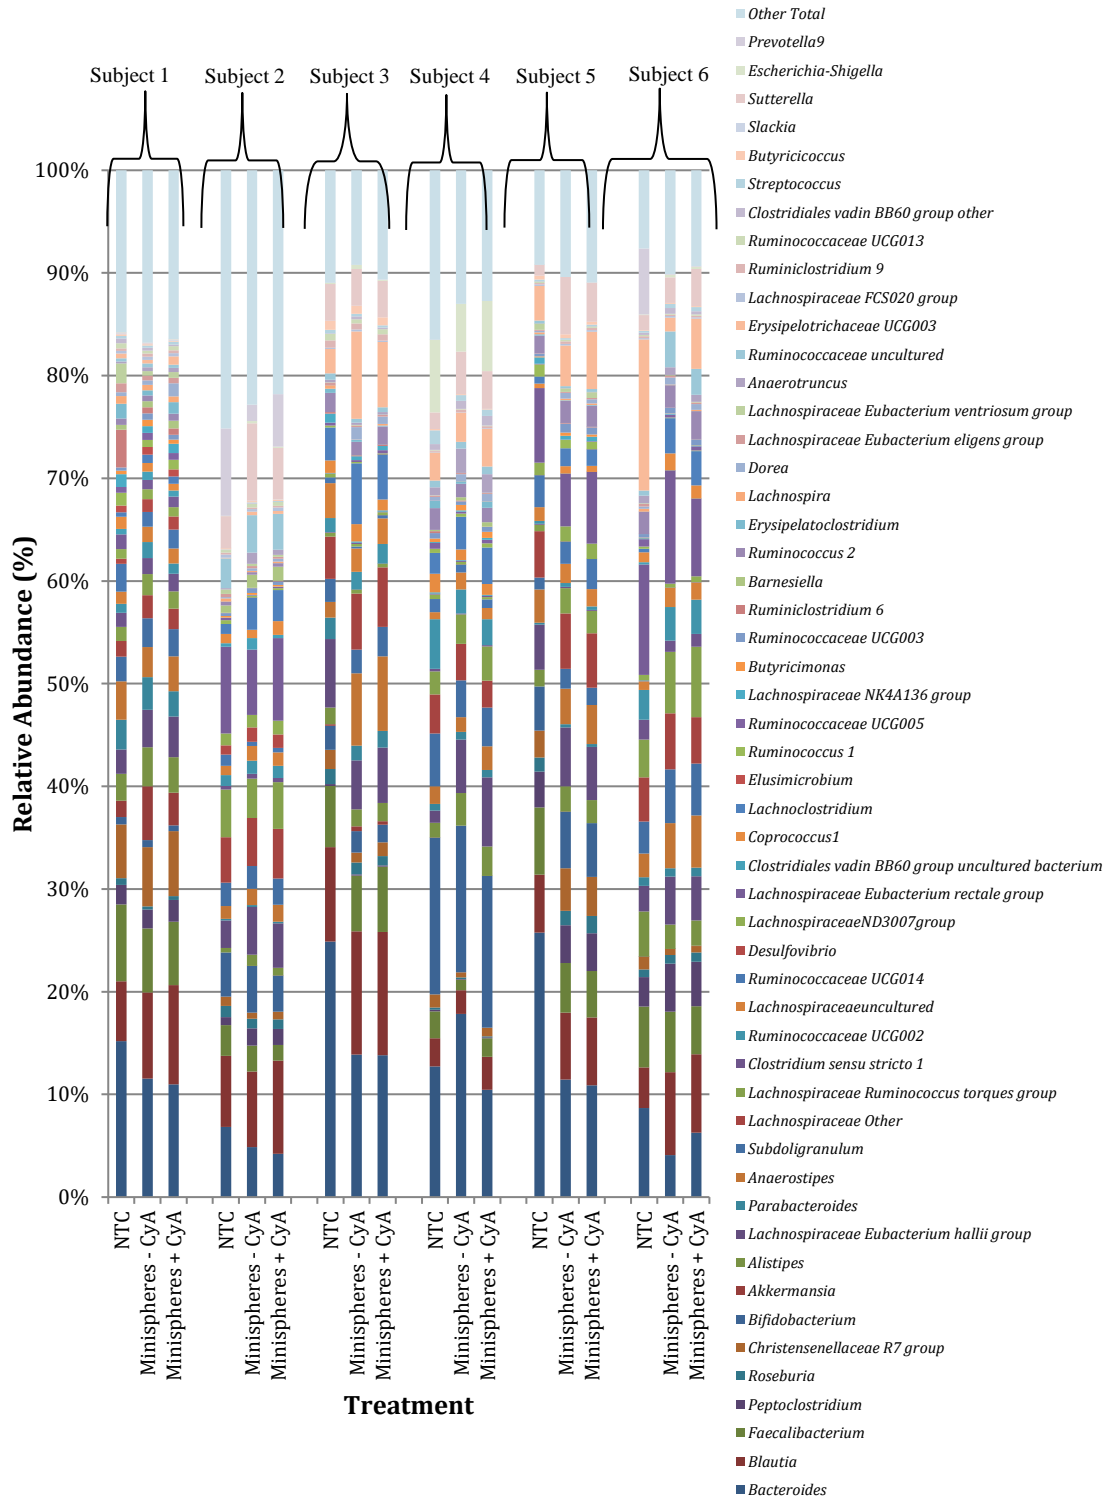

**Supplementary Figure S3.** Relative abundance (%) of the bacterial genera identified in fecal samples in treatment groups from six individual subjects (Subjects 1-6) following 24h fermentation. Groups: non-treatment control; Minispheres without (-) Cyclosporine A (CyA); Minispheres with (+) CyA

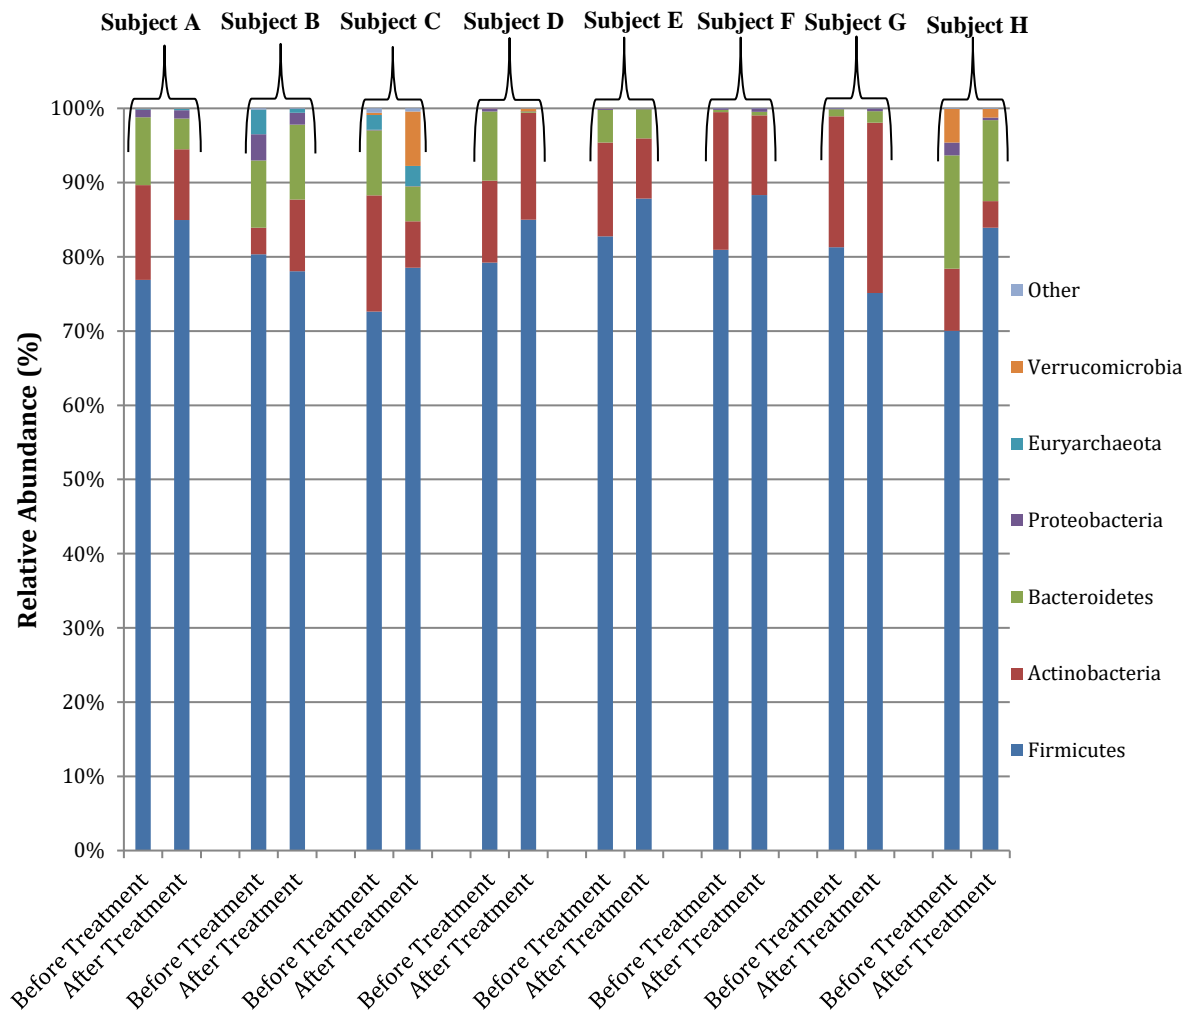

**Supplementary Figure S4.** Relative abundance (%) of the bacterial phyla identified in fecal samples from human subjects (n=8) participating in the pilot study with SmPill® + CyA, before (Day 0) and after (Day 7) treatment.

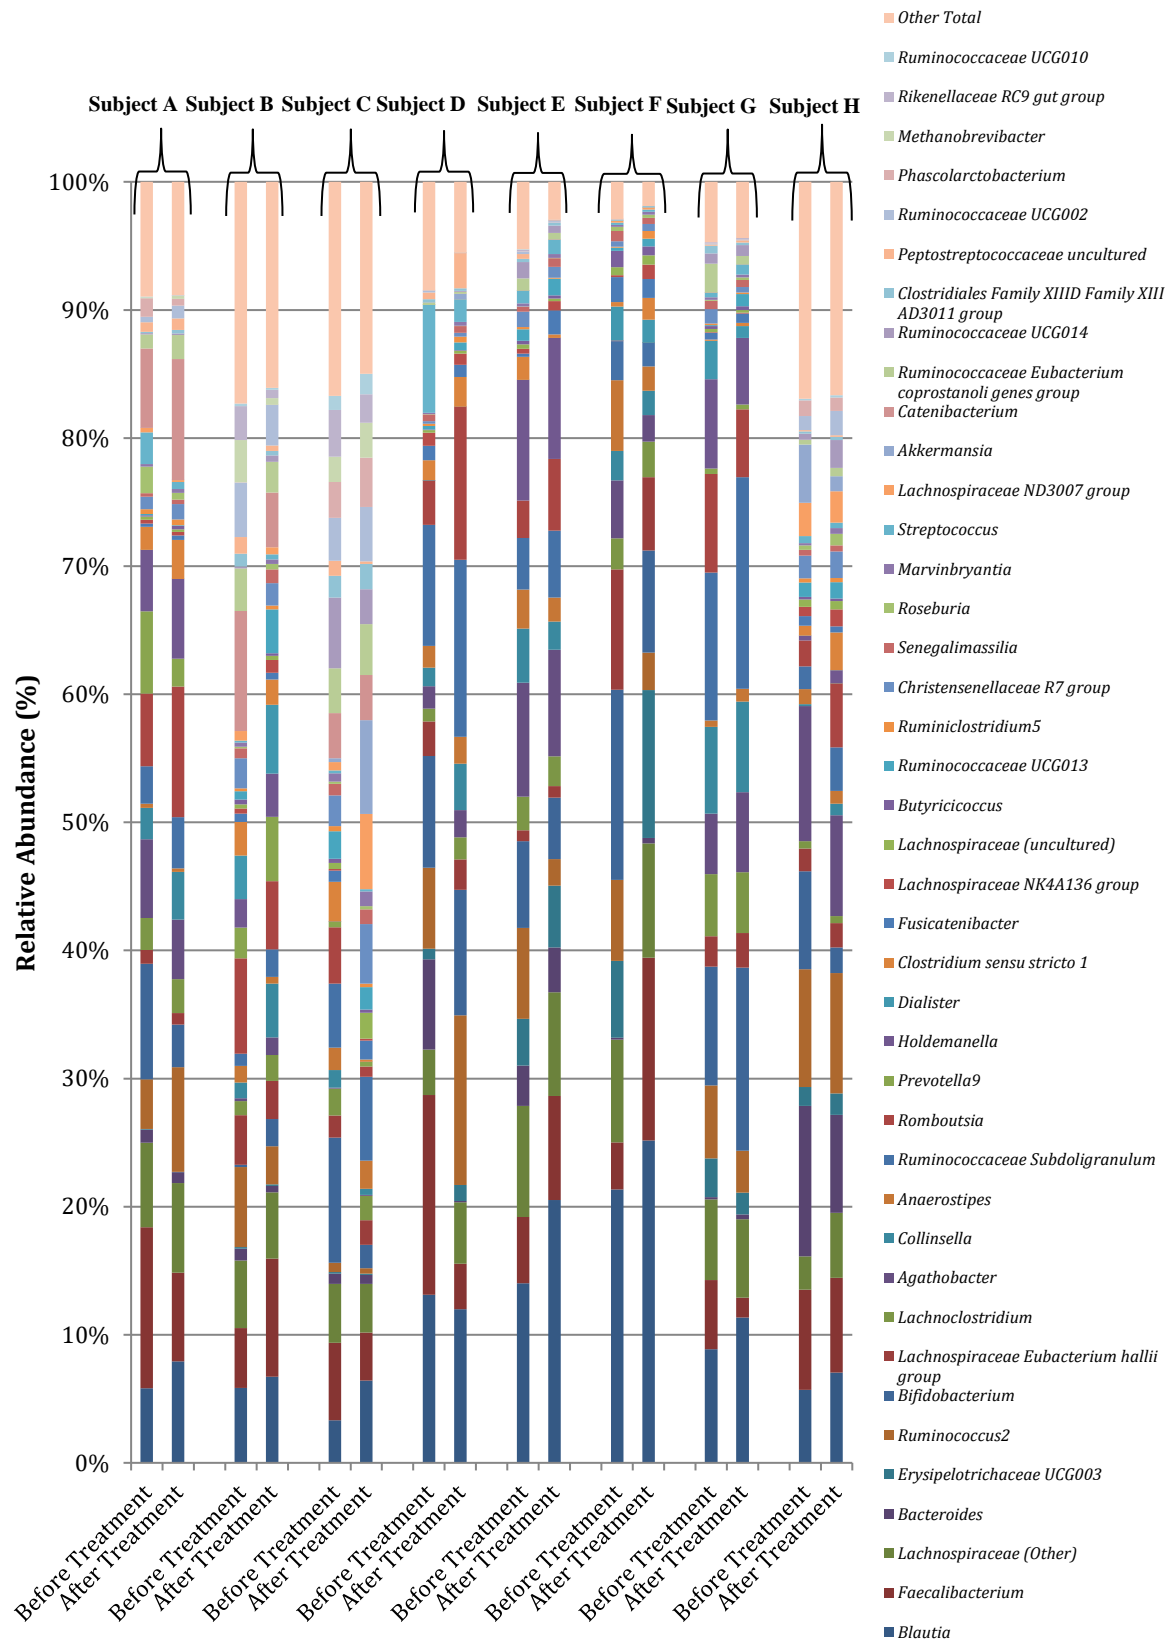

**Supplementary Figure S5.** Relative abundance (%) of the bacterial genera identified in human fecal samples from eight subjects (A-H), before and after treatment with SmPill® + Cyclosporine A (CyA)

### Supplementary Table S1

Alpha Diversity Indices (mean) for 6 fecal ferment samples across three treatment groups following 24 hour fermentation in an *ex vivo* model.

| <b>Index</b>                      | <b>No Minispheres</b> | <b>Minispheres with CyA</b> | <b>Minispheres without CyA</b> | <b>p value</b> |
|-----------------------------------|-----------------------|-----------------------------|--------------------------------|----------------|
| <b>Chao1 richness estimate</b>    | 449.1                 | 436.4                       | 430.9                          | 0.56           |
| <b>Simpson's Diversity Index</b>  | 0.96                  | 0.96                        | 0.96                           | 0.23           |
| <b>Shannon Index</b>              | 5.8                   | 5.9                         | 5.8                            | 0.38           |
| <b>Number of observed species</b> | 420.7                 | 412.3                       | 398.5                          | 0.51           |

**Supplementary Table S2.** Concentration of SCFAs (mM) in fecal samples following 24 h fermentation in an *ex vivo* model.

| SCFAs<br>(mM)  | nButyrate    |             |       | iButyrate   |             |       | Propionate  |             |       | Acetate     |             |       |
|----------------|--------------|-------------|-------|-------------|-------------|-------|-------------|-------------|-------|-------------|-------------|-------|
|                | MS* -<br>CyA | MS +<br>CyA | No MS | MS -<br>CyA | MS +<br>CyA | No MS | MS -<br>CyA | MS +<br>CyA | No MS | MS -<br>CyA | MS +<br>CyA | No MS |
| <b>Subject</b> |              |             |       |             |             |       |             |             |       |             |             |       |
| <b>1</b>       | 30.1         | 31.4        | 24.5  | 1.8         | 1.7         | 1.7   | 16          | 16          | 13.6  | 61.9        | 60          | 40.8  |
| <b>2</b>       | 21.5         | 22.1        | 15.3  | 1.3         | 1.3         | 1.3   | 8.9         | 8.9         | 8.1   | 25.1        | 25.6        | 22.6  |
| <b>3</b>       | 25           | 27.2        | 16.4  | 1.9         | 1.8         | 2     | 13.3        | 12.9        | 11.9  | 27.8        | 29.2        | 26.7  |
| <b>4</b>       | 18.9         | 21.2        | 13.3  | 1.4         | 1.3         | 1.02  | 14.3        | 12.5        | 9.4   | 68.5        | 63.4        | 46.8  |
| <b>5</b>       | 36.3         | 33.2        | 20.9  | 2.2         | 2.2         | 1.5   | 20.5        | 16.1        | 12.5  | 53          | 38          | 37.4  |
| <b>6</b>       | 29.4         | 31.3        | 21    | 1.57        | 1.41        | 1.22  | 15.2        | 15.2        | 10.9  | 47.4        | 49.6        | 33    |
| <b>Mean</b>    | 26.9         | 27.7        | 18.6  | 1.7         | 1.6         | 1.5   | 14.7        | 13.6        | 11.1  | 47.3        | 44.3        | 34.6  |
| <b>SD</b>      | 6.4          | 5.1         | 4.2   | 0.3         | 0.4         | 0.4   | 3.8         | 2.8         | 2.0   | 17.7        | 15.9        | 9.0   |
| <b>P-Value</b> | 0.02         |             |       | 0.50        |             |       | 0.13        |             |       | 0.32        |             |       |

\*MS=Minispheres; CyA = Cyclosporine A; SD = Standard Deviation

**Supplementary Table S3.** Alpha diversity of gut microbiota in fecal samples from 8 subjects who participated in the pilot study before (Day 0) and after treatment (Day 7) with SmPill® + CyA.

| <b>Alpha diversity</b>                | <b>Before treatment<br/>(Day 0)</b> | <b>After treatment<br/>(Day 7)</b> | <b>P-Value</b> |
|---------------------------------------|-------------------------------------|------------------------------------|----------------|
| <b>Chao1 richness estimate</b>        | 431.30                              | 430.61                             | 0.99           |
| <b>Simpson's Diversity<br/>Index</b>  | 0.96                                | 0.96                               | 0.84           |
| <b>Shannon Index</b>                  | 5.57                                | 5.56                               | 0.96           |
| <b>Number of observed<br/>species</b> | 404.88                              | 394.75                             | 0.88           |



**Supplementary Table S4.** Concentration of SCFAs (mM) in fecal samples from healthy subjects before (Day 0) and after (Day 7) participating in the pilot study with SmPill® + Cyclosporine A (CyA).

| SCFAs (mM) |           | nButyrate | iButyrate | Propionate | Acetate | IsoValerate | Hexanoate | Pentanoate |
|------------|-----------|-----------|-----------|------------|---------|-------------|-----------|------------|
| Subject    | Treatment |           |           |            |         |             |           |            |
| 1          | Before    | 2.5       | 0.89      | 4.8        | 13.0    | 0.71        | 0.06      | 1.17       |
|            | After     | 1.5       | 0.43      | 3.0        | 9.1     | 0.30        | 0.06      | 0.64       |
| 2          | Before    | 4.3       | 0.82      | 4.9        | 10.9    | 0.62        | 0.18      | 0.81       |
|            | After     | 7.7       | 0.84      | 17.5       | 36.4    | 0.58        | 0.62      | 1.73       |
| 3          | Before    | 5.5       | 0.31      | 11.7       | 23.3    | 0.28        | 0.31      | 0.89       |
|            | After     | 14.1      | 0.75      | 38.5       | 51.4    | 0.49        | 0.59      | 2.04       |
| 4          | Before    | 3.2       | 0.30      | 2.8        | 11.2    | 0.24        | 0.00      | 0.42       |
|            | After     | 4.5       | 0.37      | 4.5        | 21.6    | 0.25        | 0.00      | 0.36       |
| 5          | Before    | 4.2       | 0.42      | 4.0        | 17.4    | 0.28        | 0.00      | 0.51       |
|            | After     | 7.6       | 0.29      | 5.7        | 22.3    | 0.20        | 0.00      | 0.52       |
| 6          | Before    | 2.5       | 0.41      | 5.5        | 13.0    | 0.26        | 0.00      | 0.48       |
|            | After     | 10.7      | 0.46      | 8.5        | 31.4    | 0.38        | 0.00      | 0.91       |
| 7          | Before    | 6.2       | 0.44      | 9.1        | 22.1    | 0.28        | 0.00      | 0.60       |
|            | After     | 11.2      | 0.41      | 16.0       | 32.3    | 0.26        | 0.00      | 0.83       |
| 8          | Before    | 0.0       | 0.00      | 0.0        | 0.0     | 0.00        | 0.00      | 0.00       |
|            | After     | 1.5       | 0.18      | 1.7        | 6.8     | 0.15        | 0.11      | 0.26       |
| Mean       | Before    | 3.6       | 0.45      | 5.35       | 13.87   | 0.33        | 0.07      | 0.61       |
|            | After     | 7.35      | 0.47      | 11.93      | 26.41   | 0.33        | 0.17      | 0.91       |
| SD         | Before    | 1.96      | 0.29      | 3.61       | 7.35    | 0.23        | 0.11      | 0.35       |
|            | After     | 4.63      | 0.22      | 12.19      | 14.67   | 0.15        | 0.27      | 0.65       |
| P value    |           | 0.05      | 0.90      | 0.17       | 0.05    | 0.97        | 0.28      | 0.27       |

**Supplementary Table S5.** Effect of SmPill® + CyA on amino acids and other metabolites detected in fecal samples from healthy subjects (A-H) participating in a seven day pilot study.

| Subject                    | A      |       | B      |       | C      |       | D      |       | E      |       | F      |        | G      |       | H      |       |
|----------------------------|--------|-------|--------|-------|--------|-------|--------|-------|--------|-------|--------|--------|--------|-------|--------|-------|
|                            | Before | After  | Before | After | Before | After |
| <b>Compound (mM)</b>       |        |       |        |       |        |       |        |       |        |       |        |        |        |       |        |       |
| Alanine                    | 0.756  | 0.510 | 0.367  | 3.063 | 0.827  | 2.705 | 1.114  | 4.417 | 0.959  | 0.884 | 1.358  | 1.219  | 1.956  | 1.386 | 0.034  | 1.064 |
| Glycine                    | 0.370  | 0.258 | 0.146  | 1.314 | 0.411  | 1.288 | 0.615  | 1.899 | 0.566  | 0.344 | 0.764  | 0.727  | 0.753  | 0.671 | 0.010  | 0.647 |
| Valine                     | 0.345  | 0.247 | 0.143  | 1.019 | 0.276  | 0.992 | 0.512  | 1.440 | 0.429  | 0.311 | 0.711  | 0.540  | 0.594  | 0.370 | 0.017  | 0.478 |
| Leucine                    | 0.370  | 0.256 | 0.152  | 1.022 | 0.284  | 0.974 | 0.554  | 1.473 | 0.386  | 0.348 | 0.736  | 0.655  | 0.698  | 0.475 | 0.017  | 0.465 |
| Isoleucine                 | 0.232  | 0.162 | 0.100  | 0.727 | 0.202  | 0.690 | 0.353  | 1.021 | 0.269  | 0.190 | 0.534  | 0.285  | 0.433  | 0.271 | 0.009  | 0.310 |
| Threonine                  | 0.197  | 0.132 | 0.065  | 0.660 | 0.178  | 0.573 | 0.262  | 0.500 | 0.146  | 0.167 | 0.417  | 0.309  | 0.373  | 0.260 | <LOD   | 0.150 |
| Proline                    | 0.211  | 0.161 | 0.084  | 0.093 | 0.132  | 0.385 | 0.212  | 0.913 | 0.135  | 0.045 | 0.326  | 0.158  | 0.251  | 0.123 | 0.007  | 0.263 |
| Asparagine                 | 0.013  | 0.020 | 0.012  | 0.025 | 0.016  | 0.028 | 0.011  | 0.102 | 0.008  | 0.009 | 0.013  | 0.019  | 0.012  | 0.011 | 0.001  | 0.013 |
| Glutamine                  | 0.327  | 0.262 | 0.257  | 1.040 | 0.288  | 0.934 | 0.417  | 1.476 | 0.565  | 0.390 | 0.471  | 0.545  | 0.818  | 0.510 | <LOD   | 0.357 |
| Serine                     | 0.244  | 0.146 | 0.086  | 0.430 | 0.139  | 0.319 | 0.176  | 0.341 | 0.108  | 0.163 | 0.445  | 0.389  | 0.281  | 0.220 | <LOD   | 0.120 |
| Glutamic acid              | 1.040  | 0.655 | 0.415  | 2.557 | 0.779  | 2.249 | 1.821  | 4.253 | 1.682  | 1.207 | 1.569  | 1.543  | 1.793  | 1.290 | 0.018  | 1.462 |
| Methionine                 | 0.055  | 0.052 | 0.067  | 0.338 | 0.111  | 0.365 | 0.203  | 0.504 | 0.122  | 0.138 | 0.246  | 0.332  | 0.252  | 0.184 | 0.033  | 0.120 |
| Phenylalanine              | 0.148  | 0.100 | 0.072  | 0.371 | 0.123  | 0.393 | 0.250  | 0.562 | 0.156  | 0.176 | 0.322  | 0.494  | 0.300  | 0.223 | 0.018  | 0.183 |
| Ornithine                  | 0.081  | 0.051 | 0.062  | 0.416 | 0.115  | 0.371 | 0.219  | 0.271 | 0.124  | 0.168 | 0.154  | 0.099  | 0.188  | 0.177 | 0.030  | 0.213 |
| Lysine                     | 0.393  | 0.237 | 0.161  | 1.445 | 0.313  | 1.159 | 0.624  | 1.845 | 0.530  | 0.405 | 0.900  | 0.951  | 0.986  | 0.766 | 0.019  | 0.563 |
| Histidine                  | 0.323  | 0.189 | <LOD   | 0.462 | <LOD   | 0.338 | 0.197  | 3.294 | <LOD   | <LOD  | 0.344  | 1.545  | <LOD   | 0.407 | <LOD   | <LOD  |
| Tyrosine                   | 0.121  | 0.083 | 0.060  | 0.278 | 0.100  | 0.305 | 0.242  | 0.576 | 0.139  | 0.159 | 0.274  | 0.363  | 0.277  | 0.201 | 0.014  | 0.154 |
| Tryptophan                 | 0.058  | 0.054 | 0.052  | 0.098 | 0.059  | 0.104 | 0.078  | 0.143 | 0.061  | 0.073 | 0.083  | 0.091  | 0.097  | 0.090 | <LOD   | 0.062 |
| Aspartate                  | 0.311  | 0.220 | 0.096  | 0.724 | 0.092  | 0.640 | 0.208  | 1.234 | 0.123  | 0.134 | 0.730  | 0.967  | 0.220  | 0.243 | 0.017  | 0.148 |
| Succinic acid              | 0.135  | 0.148 | 0.061  | 2.303 | 1.214  | 2.855 | 1.934  | 2.593 | 2.487  | 2.911 | 0.452  | 14.459 | 2.025  | 1.838 | 0.011  | 1.663 |
| Lactic acid                | 0.069  | 0.032 | 0.100  | 2.299 | 3.489  | 2.253 | 0.311  | 0.326 | 0.875  | 1.661 | 0.157  | 0.719  | 0.710  | 0.925 | 0.041  | 0.394 |
| Fumaric acid               | 0.015  | 0.009 | <LOD   | 0.025 | 0.011  | 0.027 | 0.007  | 0.063 | 0.012  | <LOD  | 0.008  | 0.077  | 0.029  | 0.018 | <LOD   | 0.019 |
| Malic acid                 | 0.419  | 0.265 | 0.177  | 0.322 | 0.245  | 0.423 | 0.201  | 0.352 | 0.275  | 0.112 | 0.196  | 0.607  | 0.600  | 0.569 | 0.016  | 0.237 |
| 2-oxoglutarate             | 0.080  | 0.058 | 0.021  | 0.083 | 0.028  | 0.060 | 0.028  | 0.089 | 0.050  | 0.032 | 0.041  | 0.046  | 0.063  | 0.047 | <LOD   | 0.041 |
| cis-Aconitic acid          | 0.019  | 0.022 | 0.020  | 0.031 | 0.023  | 0.036 | 0.016  | 0.024 | 0.017  | 0.018 | 0.020  | 0.023  | 0.021  | 0.020 | 0.011  | 0.015 |
| Isocitric acid             | 0.037  | 0.039 | 0.032  | 0.055 | 0.035  | 0.050 | 0.043  | 0.045 | 0.037  | 0.038 | 0.040  | 0.044  | 0.050  | 0.042 | 0.028  | 0.038 |
| Citric acid                | 0.055  | 0.053 | 0.045  | 0.067 | 0.036  | 0.060 | 0.046  | 0.069 | 0.040  | 0.043 | 0.059  | 0.049  | 0.047  | 0.053 | 0.026  | 0.044 |
| Heptanoic acid (C7:0)      | 0.743  | 0.403 | 0.915  | 4.357 | 1.262  | 2.974 | <LOD   | 0.101 | <LOD   | 0.098 | 0.168  | 0.227  | 0.110  | 0.104 | <LOD   | 0.884 |
| Octanoic acid (C8:0)       | <LOD   | <LOD  | 0.305  | 0.739 | <LOD   | 0.569 | <LOD   | 0.769 | <LOD   | 0.900 | <LOD   | 6.133  | <LOD   | <LOD  | <LOD   | 0.525 |
| Linoleic acid (C12:2)      | 0.665  | 0.415 | 0.119  | 1.421 | 0.134  | 0.411 | 0.649  | 0.868 | 0.254  | 1.260 | 0.457  | 1.662  | 0.362  | 0.292 | <LOD   | 0.293 |
| Phenylacetic acid          | 2.195  | 1.078 | 1.562  | 1.830 | 0.229  | 1.082 | 0.675  | 0.640 | 0.700  | 0.529 | 0.881  | 0.510  | 0.889  | 0.552 | 0.032  | 0.422 |
| 4-Hydroxyphenylacetic acid | 0.320  | 0.599 | 0.806  | 1.887 | 0.228  | 1.131 | 0.106  | 1.422 | 0.331  | 0.119 | 3.039  | 1.098  | 0.719  | 0.492 | <LOD   | 0.129 |
| Indole-3-acetic acid       | 0.233  | 0.202 | 0.046  | 4.414 | <LOD   | 0.861 | 0.273  | 0.392 | 0.250  | 1.542 | 0.123  | 0.558  | 1.836  | 1.075 | <LOD   | 0.126 |

**Supplementary Table S6.** The effect of uncoated minispheres with (+) and without (-) Cyclosporine A (CyA) ( $0.75 \text{ mg ml}^{-1}$ ) on the growth of *Bacteroides* sp *in vitro* (cfu/ml)

| <b>Bacteroides Strain</b>     | <b>Treatment</b>                               | <b>TBC (cfu/ml)</b> |
|-------------------------------|------------------------------------------------|---------------------|
|                               |                                                | T48                 |
| <i>Bacteroides distasonis</i> | No Treatment control                           | $6.6 \times 10^9$   |
|                               | Minispheres without cyclosporine (uncoated)    | $2.2 \times 10^9$   |
|                               | Minispheres with cyclosporine (uncoated)       | $2.6 \times 10^8$   |
| <i>Bacteroides dorei</i>      | No Treatment control                           | $4.86 \times 10^8$  |
|                               | Minispheres without cyclosporine (uncoated)    | $3.78 \times 10^6$  |
|                               | Minispheres with cyclosporine (uncoated)       | $1.78 \times 10^6$  |
| <i>Bacteroides fragilis</i>   | No Treatment control                           | $2.58 \times 10^6$  |
|                               | Minispheres without cyclosporine (uncoated)    | $4.04 \times 10^6$  |
|                               | Minispheres with Cyclosporine (uncoated) beads | $3.12 \times 10^6$  |
